# Supplementary material for: Synthesis of camphene by α-pinene isomerization using acid nano titanium dioxide catalysts
Source: Royal Society of Chemistry journal article supplement (doi:10.1039/d3nj00229b), 2023-01-01
Supplement: d3nj00229b1.pdf [file d3nj00229b1.pdf]

**Electronic Supplementary Information**

**Synthesis of Camphene by  $\alpha$ -Pinene Isomerization Using Acid Nano  
Titanium Dioxide Catalysts**

Wenxing Wu, Yanqi Chen, Naiwang Liu, Li Shi, Xuan Meng\*

International Joint Research Center of Green Energy Chemical Engineering, East China University  
of Science and Technology, Shanghai, 200237, China

\*Corresponding author.

E-mail address: mengxuan@ecust.edu.cn

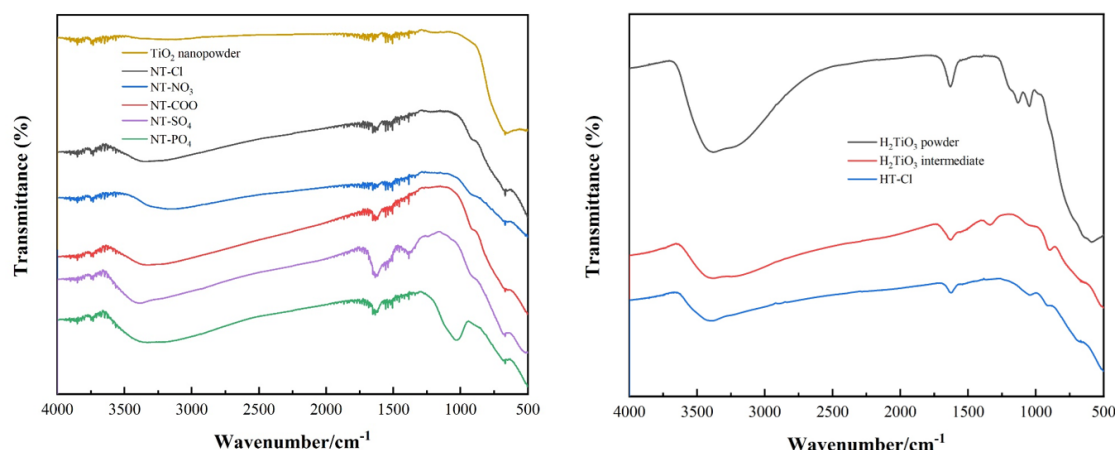

Fig. S1 FT-IR spectra of samples

Several precursors and catalysts were identified by FT-IR analysis, and the corresponding FT-IR spectra are depicted in Fig. S1. The FT-IR spectra of the six acid catalysts were similar. The  $\text{TiO}_2$  nanopowder and  $\text{H}_2\text{TiO}_3$  powder without acid treatment showed peaks between  $500$  and  $880\text{ cm}^{-1}$ , indicating the vibration and adsorption of the  $\text{Ti-O}$  bond and  $\text{O-Ti-O}$  bond in titanium dioxide anatase. For  $\text{NT-PO}_4$ , it has been discovered that the primary peak of the  $\text{Ti-O-Ti}$  linkage shifts to  $1032\text{ cm}^{-1}$ . Broad spectrum was seen between  $3100$  and  $3536\text{ cm}^{-1}$  in the case of the activation utilizing several acids, which can be attributed to hydroxyl group stretching; these peaks essentially have no impact on the reaction[1]. All acids-treated catalysts exhibit a sharp peak between  $1612$  and  $1651\text{ cm}^{-1}$ , varying according to the type of acid used. The observed peaks represent the  $\text{H-O-H}$  bending mode and the  $\text{O-H}$  bending of water adsorbed on the surface of titanium dioxide, indicating the hydrogenation and protonation of  $\text{TiO}_2$  particles during acid activation[1]. It appears that acid activation for precursors is indeed responsible for promoting hydroxyl groups (Bronsted acidic sites) as supported by FTIR analysis.

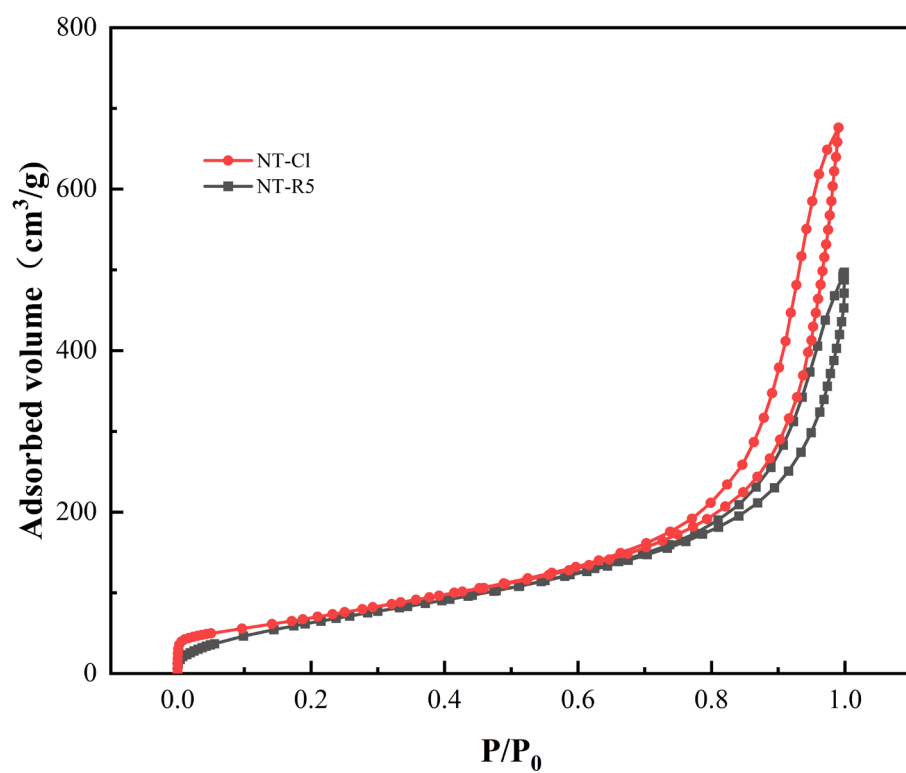

Fig. S2 N<sub>2</sub> adsorption-desorption isotherms of fresh catalyst and regeneration catalyst.

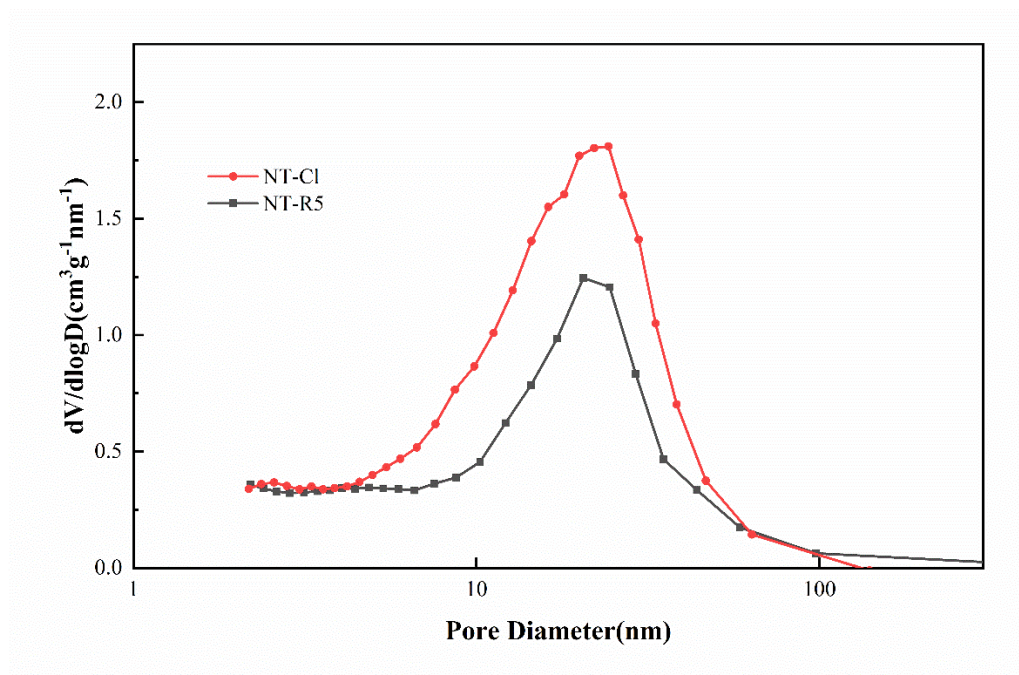

Fig. S3 The corresponding pore size distributions of fresh catalyst and regeneration catalyst.

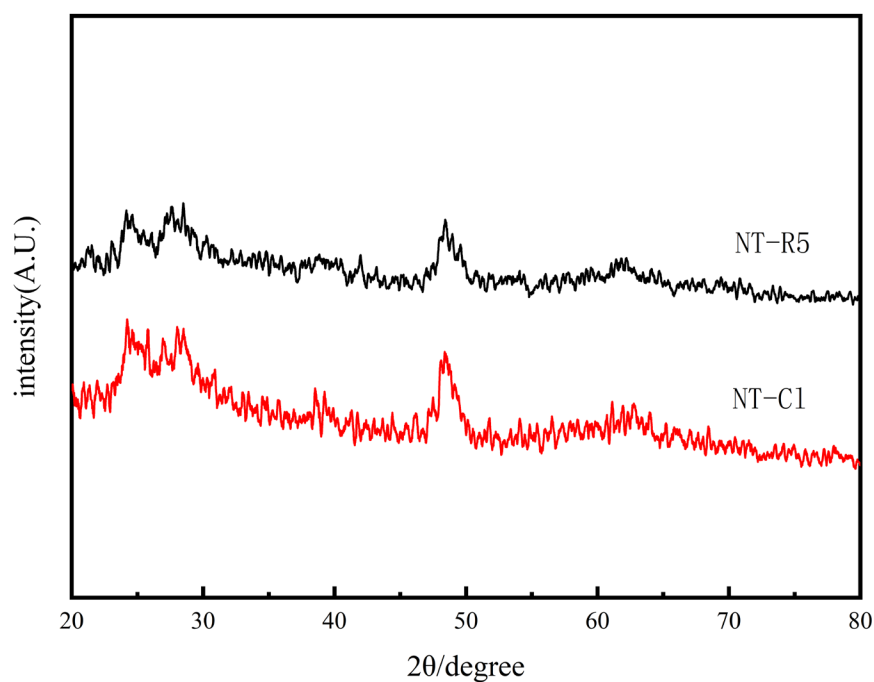

Fig. S4 XRD patterns of fresh catalyst and regeneration catalyst.

Table. S1 BET analysis of fresh catalyst and regeneration catalyst

| Prepared samples      | $S_{\text{BET}}$<br>( $\text{m}^2/\text{g}$ ) | $S_{\text{meso}}$<br>( $\text{m}^2/\text{g}$ ) | $V_{\text{total}}$<br>( $\text{cm}^3/\text{g}$ ) | PD<br>(nm) |
|-----------------------|-----------------------------------------------|------------------------------------------------|--------------------------------------------------|------------|
| NT-C1                 | 314.4                                         | 314.4                                          | 0.834                                            | 15.5       |
| Regeneration Catalyst | 247.0                                         | 247.0                                          | 0.753                                            | 11.2       |

## REFERENCES

[1] Se-Keun, Park, Hyunho, Shin, Effect of HCl and H<sub>2</sub>SO<sub>4</sub> treatment of TiO<sub>2</sub> powder on the photosensitized degradation of aqueous rhodamine B under visible light, Journal of Nanoscience & Nanotechnology, (2014).
